# Supplementary material for: Storyboarding in extended reality: a comparison between two tabletop solutions
Source: Research Square preprint supplement (doi:10.21203/rs.3.rs-4807470/v1), 2024-08-22
Supplement: Supplementary file 1 [file Data.xlsx]

## Sheet: AR - SUS
Title	Storyboarding in Extended Reality: a Comparison between Two Tabletop Solutions
Journal	Virtual Reality
Authors	Federico Manuri(1), Francesco De Pace(2), Valentina Carrescia(1), Sara Piumatti(1) and Andrea Sanna(1)
Affiliations	(1) Department of Control and Computer Engineering, Politecnico di Torino, corso Duca degli Abruzzi 24, Torino,10129, Italy
	(2) Institute of Visual Computing and Human-Centered Technology, TU, Wien, Favoritenstrasse 11, Vienna, 1040, Austria
e-mail	federico.manuri@polito.it
AR
SUS
	Q1	Q2	Q3	Q4	Q5	Q6	Q7	Q8	Q9	Q10
U1	5	2	3	1	4	4	5	3	3	2
U2	4	2	3	2	4	2	3	4	3	2
U3	3	2	3	4	4	2	3	2	3	1
U4	4	2	2	4	4	2	4	3	2	3
U5	4	2	1	4	5	2	2	4	3	5
U6	4	1	4	3	4	2	4	1	4	2
U7	4	3	2	5	3	1	4	4	2	5
U8	4	3	2	3	2	3	3	4	1	4
U9	5	1	5	3	4	1	4	2	4	3
U10	2	2	3	4	3	1	4	2	3	3
U11	2	5	2	5	2	4	1	5	2	4
U12	4	1	4	2	4	3	5	2	4	1
U13	3	2	2	4	4	2	4	3	3	2
U14	1	3	2	5	2	2	1	4	1	5
U15	3	1	2	3	2	2	4	5	2	4
U16	3	3	2	4	3	4	2	3	2	5
U17	5	1	4	2	5	1	4	1	4	2
U18	3	1	3	4	5	1	4	2	3	2
U19	5	2	2	2	3	3	4	2	3	1
U20	3	2	3	4	3	2	3	4	3	2
U21	3	2	3	2	4	2	3	2	4	1

## Sheet: VR - SUS
VR
SUS
	Q1	Q2	Q3	Q4	Q5	Q6	Q7	Q8	Q9	Q10
U1	4	1	5	2	4	1	4	1	5	1
U2	5	1	5	1	4	1	5	1	5	1
U3	4	2	3	2	4	1	5	2	4	1
U4	4	2	4	1	4	2	5	2	5	1
U5	5	1	5	2	5	1	5	1	5	2
U6	5	2	4	2	4	1	4	2	3	2
U7	4	1	3	4	4	1	5	2	3	2
U8	5	1	4	1	4	1	4	3	4	1
U9	4	1	3	2	5	1	3	2	3	2
U10	4	2	3	4	4	1	4	3	3	2
U11	5	1	4	2	4	1	5	2	5	2
U12	3	1	5	3	5	1	5	2	4	2
U13	5	1	5	4	4	1	5	1	5	1
U14	4	1	5	2	4	2	4	1	3	2
U15	3	1	4	1	4	1	5	3	5	1
U16	3	1	4	3	5	1	5	3	4	1
U17	4	1	5	1	3	1	4	1	4	1
U18	3	2	4	1	5	1	3	2	3	1
U19	5	1	4	1	5	1	5	2	4	1
U20	5	2	4	2	4	1	5	2	3	2
U21	5	2	4	1	3	1	3	4	4	4

## Sheet: AR - NASA-TLX
AR	NASA TLX
	scale/Effort	scale/Frustration Level	scale/Mental Demand	scale/Performance	scale/Physical Demand	scale/Temporal Demand		Taskload		weightedWorkload/Effort	weightedWorkload/Frustration Level	weightedWorkload/Mental Demand	weightedWorkload/Performance	weightedWorkload/Physical Demand	weightedWorkload/Temporal Demand		workload/Effort	workload/Frustration Level	workload/Mental Demand	workload/Performance	workload/Physical Demand	workload/Temporal Demand
U1	40	40	20	20	10	50		33.33		160	120	20	100	0	100		4	3	1	5	0	2
U2	30	10	70	30	10	20		40		90	20	350	120	0	20		3	2	5	4	0	1
U3	70	40	70	40	40	0		54		280	120	210	80	120	0		4	3	3	2	3	0
U4	60	20	40	50	70	20		53.33		240	0	80	250	210	20		4	0	2	5	3	1
U5	90	40	80	30	10	0		55.33		270	120	320	120	0	0		3	3	4	4	0	1
U6	30	30	10	40	10	20		26		120	30	40	160	0	40		4	1	4	4	0	2
U7	90	70	90	70	20	80		80		270	280	360	210	0	80		3	4	4	3	0	1
U8	80	90	50	90	70	30		79.33		320	360	100	270	140	0		4	4	2	3	2	0
U9	20	20	30	30	10	10		22		20	100	120	60	0	30		1	5	4	2	0	3
U10	70	60	30	40	60	90		64.67		210	300	60	40	0	360		3	5	2	1	0	4
U11	80	90	80	80	10	90		83.33		320	360	160	320	0	90		4	4	2	4	0	1
U12	30	40	20	30	20	40		33.33		90	80	20	150	0	160		3	2	1	5	0	4
U13	70	70	40	70	20	50		64.67		280	280	80	280	0	50		4	4	2	4	0	1
U14	90	90	60	40	0	0		68.67		360	450	180	40	0	0		4	5	3	1	0	2
U15	80	60	70	90	10	70		72.67		400	60	70	270	10	280		5	1	1	3	1	4
U16	80	60	70	90	60	80		72		240	240	0	180	180	240		3	4	0	2	3	3
U17	60	20	60	0	20	10		26		60	40	240	0	20	30		1	2	4	4	1	3
U18	60	60	70	50	10	40		60.67		180	240	350	100	0	40		3	4	5	2	0	1
U19	40	30	10	20	10	10		18		80	60	30	40	10	50		2	2	3	2	1	5
U20	30	40	70	60	60	40		47.33		90	160	140	240	0	80		3	4	2	4	0	2
U21	70	30	70	30	30	60		52		280	30	140	150	0	180		4	1	2	5	0	3

## Sheet: VR - NASA-TLX
VR	NASA TLX
	scale/Effort	scale/Frustration Level	scale/Mental Demand	scale/Performance	scale/Physical Demand	scale/Temporal Demand		Taskload		weightedWorkload/Effort	weightedWorkload/Frustration Level	weightedWorkload/Mental Demand	weightedWorkload/Performance	weightedWorkload/Physical Demand	weightedWorkload/Temporal Demand		workload/Effort	workload/Frustration Level	workload/Mental Demand	workload/Performance	workload/Physical Demand	workload/Temporal Demand
U1	20	0	60	10	0	0		26.67		60	0	300	40	0	0		3	1	5	4	0	2
U2	20	0	40	10	20	0		17.33		80	0	80	40	60	0		4	1	2	4	3	1
U3	20	40	20	20	60	10		30.67		60	80	40	100	180	0		3	2	2	5	3	0
U4	10	0	0	10	0	0		4		40	0	0	20	0	0		4	5	1	2	2	1
U5	20	0	20	10	0	50		15.33		40	0	100	40	0	50		2	0	5	4	3	1
U6	50	40	60	10	30	0		36.67		150	80	240	50	30	0		3	2	4	5	1	0
U7	20	0	10	40	0	10		20.67		40	0	40	200	0	30		2	1	4	5	0	3
U8	20	0	10	60	0	10		21.33		60	0	40	180	0	40		3	1	4	3	0	4
U9	40	10	10	20	60	50		37.33		120	40	0	20	180	200		3	4	0	1	3	4
U10	60	30	70	20	10	50		44.67		180	60	280	100	0	50		3	2	4	5	0	1
U11	10	10	10	10	0	0		8.67		40	10	40	40	0	0		4	1	4	4	0	2
U12	70	0	60	30	40	20		42.67		280	0	240	60	40	20		4	3	4	2	1	1
U13	0	0	20	10	10	20		10.67		0	0	80	30	30	20		2	2	4	3	3	1
U14	40	0	70	20	20	10		35.33		160	0	280	80	0	10		4	2	4	4	0	1
U15	20	20	20	30	0	0		20.67		100	40	80	90	0	0		5	2	4	3	1	0
U16	10	20	10	40	30	0		19.33		30	80	20	160	0	0		3	4	2	4	0	2
U17	50	0	70	0	50	0		28.67		100	0	280	0	50	0		2	0	4	5	1	3
U18	50	0	40	50	10	0		28.67		150	0	80	200	0	0		3	5	2	4	0	1
U19	10	0	10	10	0	0		8		40	0	30	50	0	0		4	0	3	5	1	2
U20	70	20	40	70	10	60		46.67		210	100	120	210	0	60		3	5	3	3	0	1
U21	40	30	70	10	70	30		36.67		160	0	210	50	70	60		4	0	3	5	1	2

## Sheet: NIELSEN
NIELSEN'S USABILITY HEURISTICS
	Visibility of System Status	Match Between the System and the Real World	User Control and Freedom	Consistency and Standards	Error Prevention	Recognition Rather than Recall	Flexibility and Efficiency of Use	Aesthetic and Minimalist Design	Help Users Recognize, Diagnose, and Recover from Errors	Help and Documentation
AR
U1	3	4	2	3	2	4	4	5	3	4
U2	3	4	4	4	4	3	4	4	3	4
U3	4	4	4	5	4	5	5	5	4	5
VR
U1	4	5	5	4	4	5	5	4	4	5
U2	4	5	5	5	3	4	5	5	3	5
U3	5	5	4	5	4	5	4	4	4	5
